# Supplementary material for: SynthEye: Investigating the Impact of Synthetic Data on Artificial Intelligence-assisted Gene Diagnosis of Inherited Retinal Disease
Source: PubMed Central journal article supplement — Ophthalmol Sci. 2022 Nov 22;3(2):100258. doi: 10.1016/j.xops.2022.100258 (PMC9852957; doi:10.1016/j.xops.2022.100258), 2022-11-22

**Supplementary Figure 1: Natural class imbalance found in Moorfields Eye Hospital Inherited Retinal Disease cohort. Gene classes such as *ABCA4* and *USH2A* are found in high numbers relative to other diseases.**

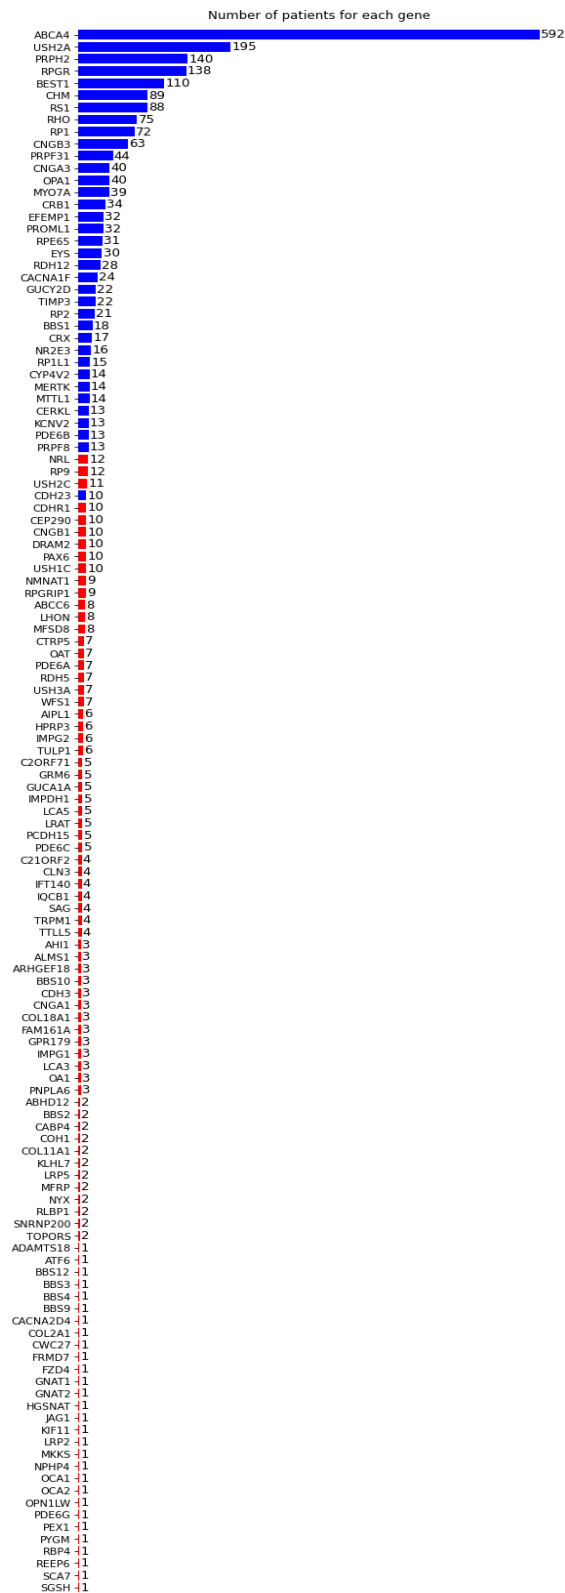

Supplement: mmc1.pdf [file mmc1.pdf]
