# Supplementary material for: SynthEye: Investigating the Impact of Synthetic Data on Artificial Intelligence-assisted Gene Diagnosis of Inherited Retinal Disease
Source: PubMed Central journal article supplement — Ophthalmol Sci. 2022 Nov 22;3(2):100258. doi: 10.1016/j.xops.2022.100258 (PMC9852957; doi:10.1016/j.xops.2022.100258), 2022-11-22

**Supplementary Figure 4: Diversity of our FAF subset of the Moorfields Eye Hospital Inherited Retinal Disease (IRD) Cohort. Patient information was collected from hospital records. (a) The average number of scans per laterality per IRD gene (b) Ethnicities represented within the dataset and (c) Mode of inheritance for represented patients. We acknowledge that ethnicity is a cultural construct with biological contribution through genetic heritage, but does not have well defined nor clear scientific meaning.**

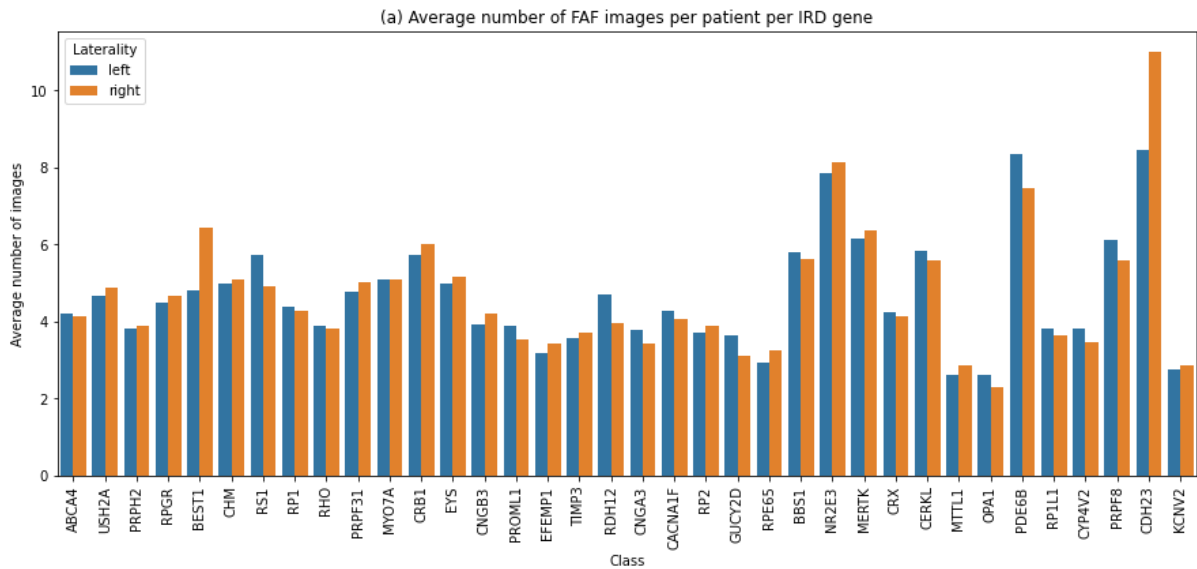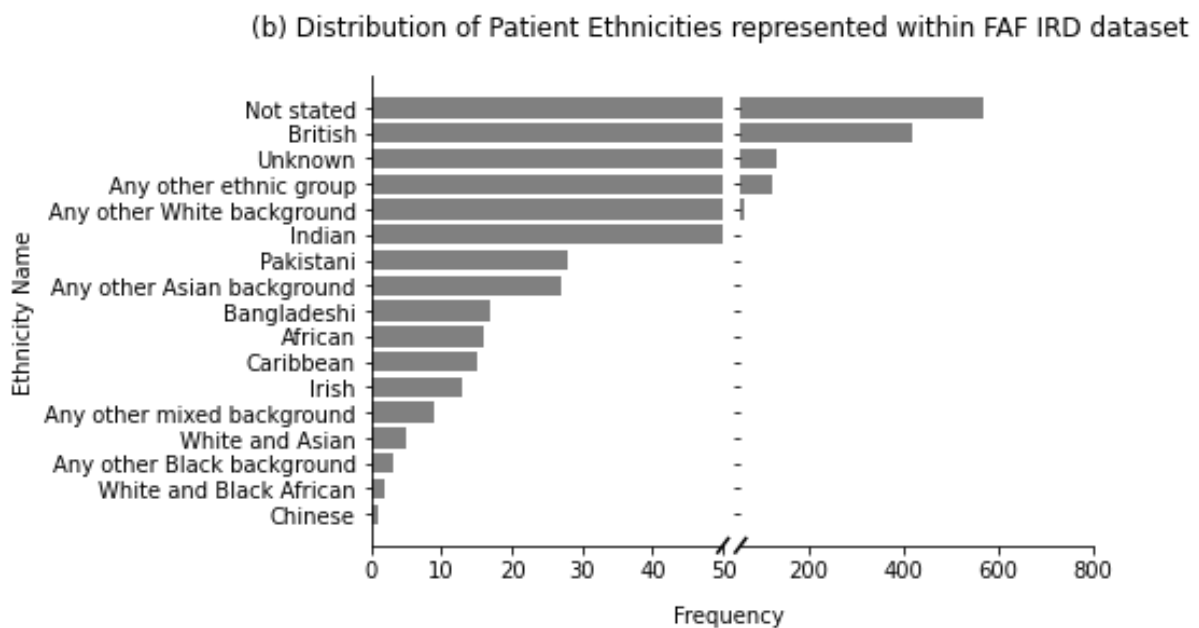

(c) Distribution of patient IRD Mode of Inheritance within FAF IRD dataset

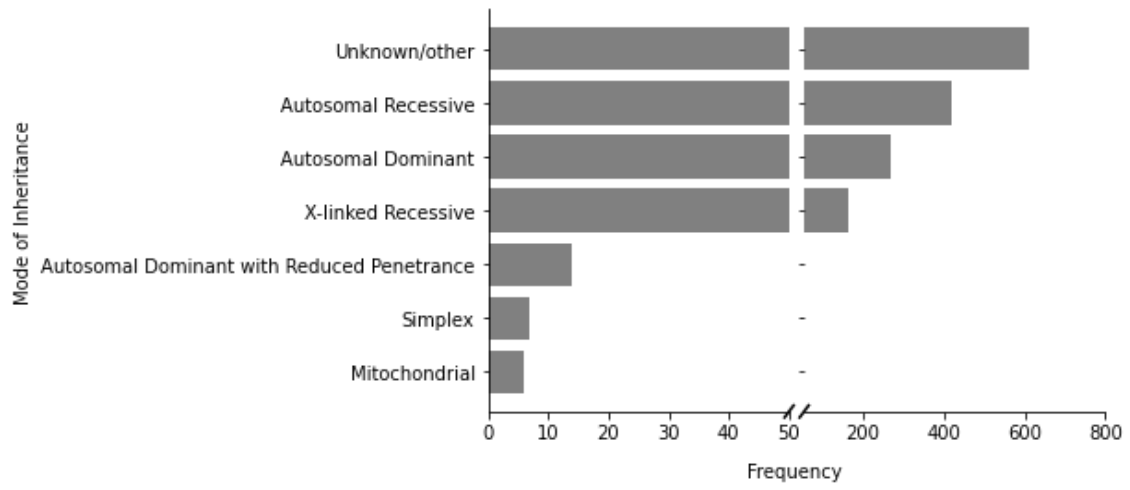

Supplement: mmc3.pdf [file mmc3.pdf]
