# Supplementary material for: SynthEye: Investigating the Impact of Synthetic Data on Artificial Intelligence-assisted Gene Diagnosis of Inherited Retinal Disease
Source: PubMed Central journal article supplement — Ophthalmol Sci. 2022 Nov 22;3(2):100258. doi: 10.1016/j.xops.2022.100258 (PMC9852957; doi:10.1016/j.xops.2022.100258), 2022-11-22

**Supplementary Figure 5: Examples of synthetic images created from our initial experiments with multi-scale gradients Generative Adversarial Network (GAN). Rows represent the class and columns represent different noise vectors used to generate the image. While the images were of reasonable quality, the GAN was not able to reproduce the diversity of the training set.**

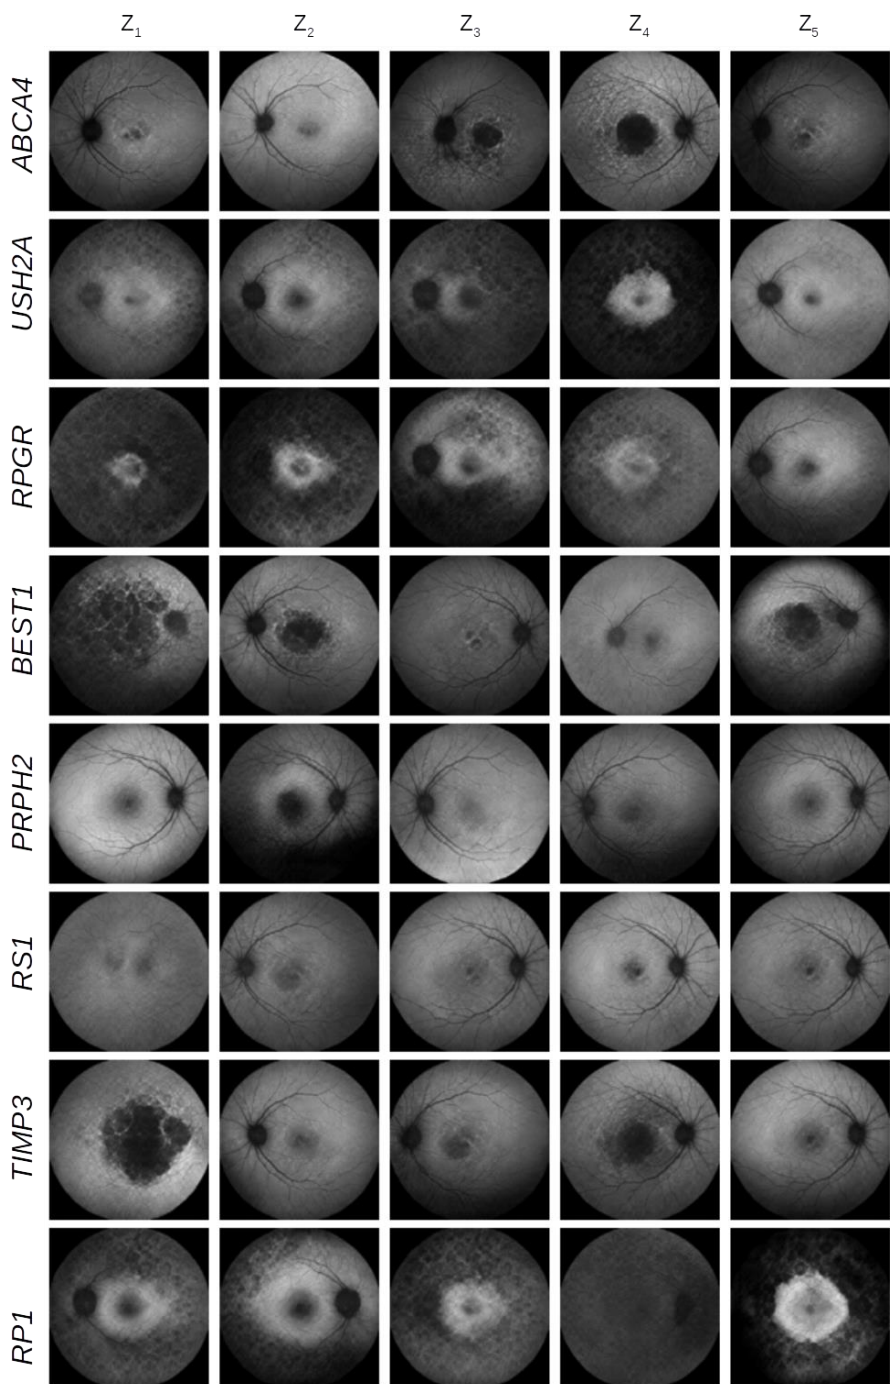

Supplement: mmc4.pdf [file mmc4.pdf]
