# Supplementary material for: SynthEye: Investigating the Impact of Synthetic Data on Artificial Intelligence-assisted Gene Diagnosis of Inherited Retinal Disease
Source: PubMed Central journal article supplement — Ophthalmol Sci. 2022 Nov 22;3(2):100258. doi: 10.1016/j.xops.2022.100258 (PMC9852957; doi:10.1016/j.xops.2022.100258), 2022-11-22

**Supplementary Figure 8: Synthetic images produced by our trained StyleGAN2 generator. Images belong to 36 different inherited retinal disease classes, indicated by the rows.**

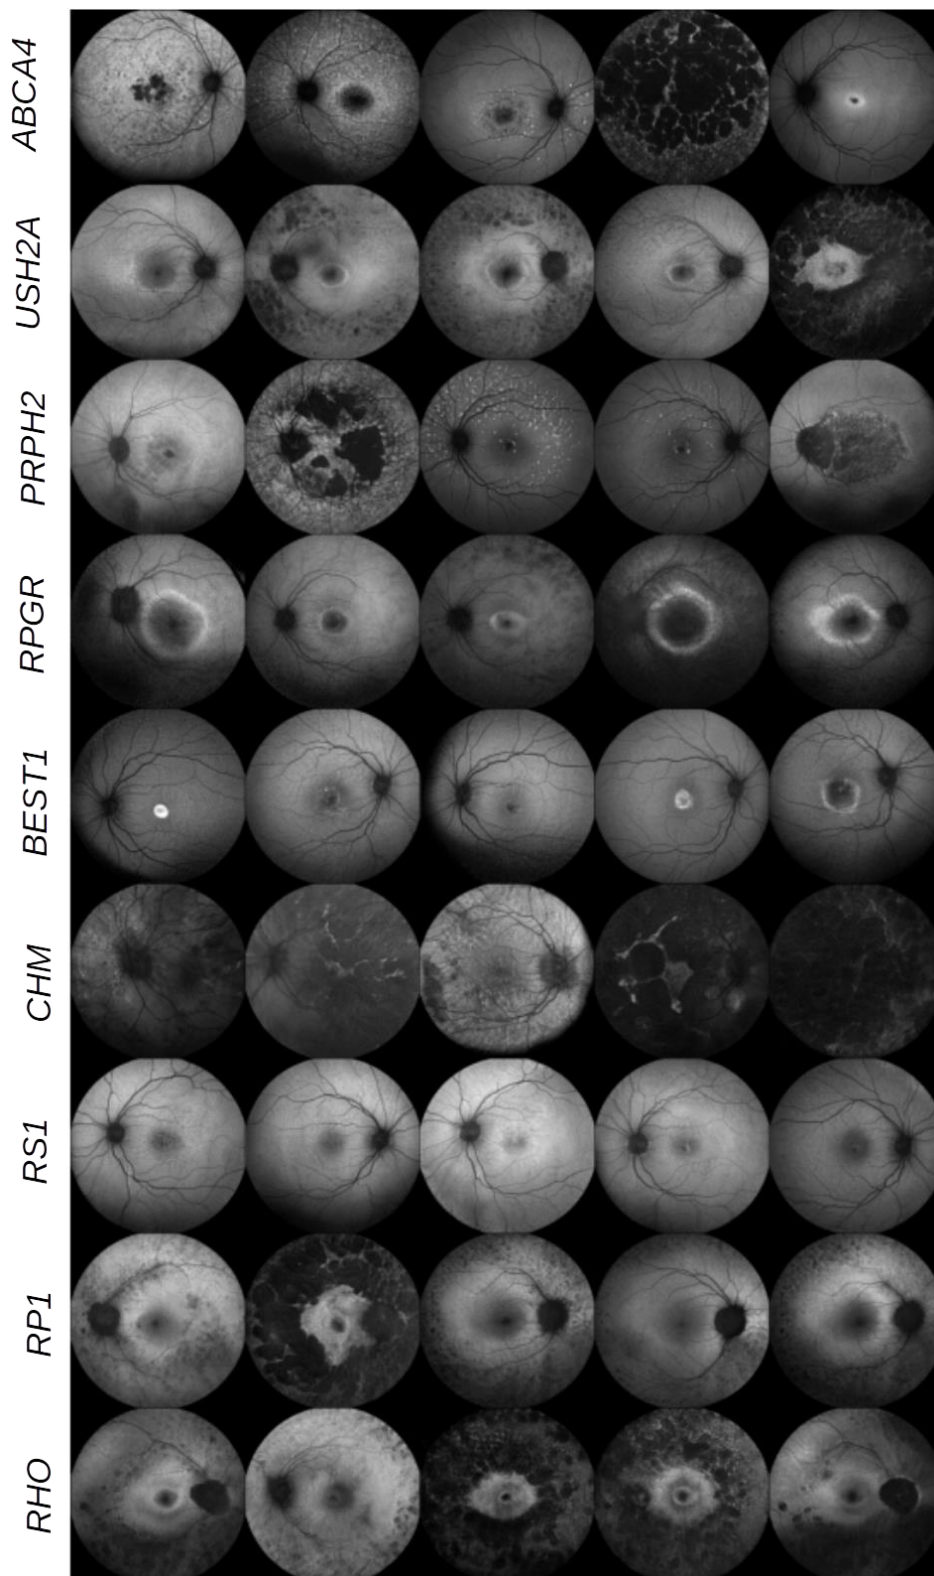

RDH12 TIMP3 EFEMP1 PROML1 CNGB3 EYS CRB1 MYO7A PRPF31

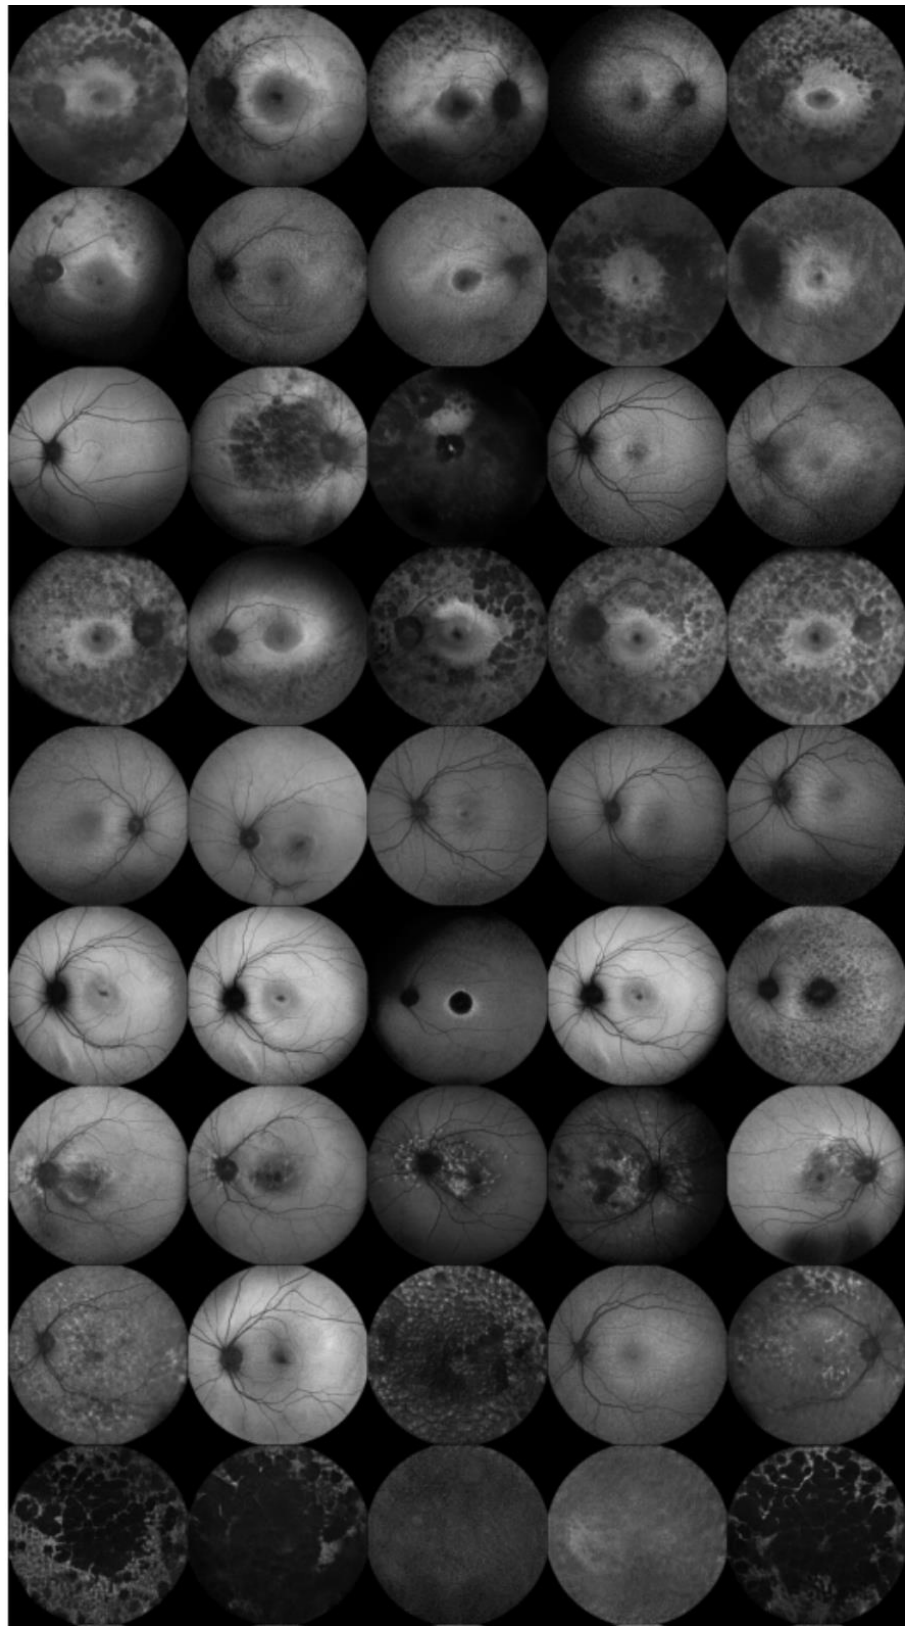

CRX MERTK NRE23 BBS1 RPE65 GUCY2D RP2 CACNA1F CNGA3

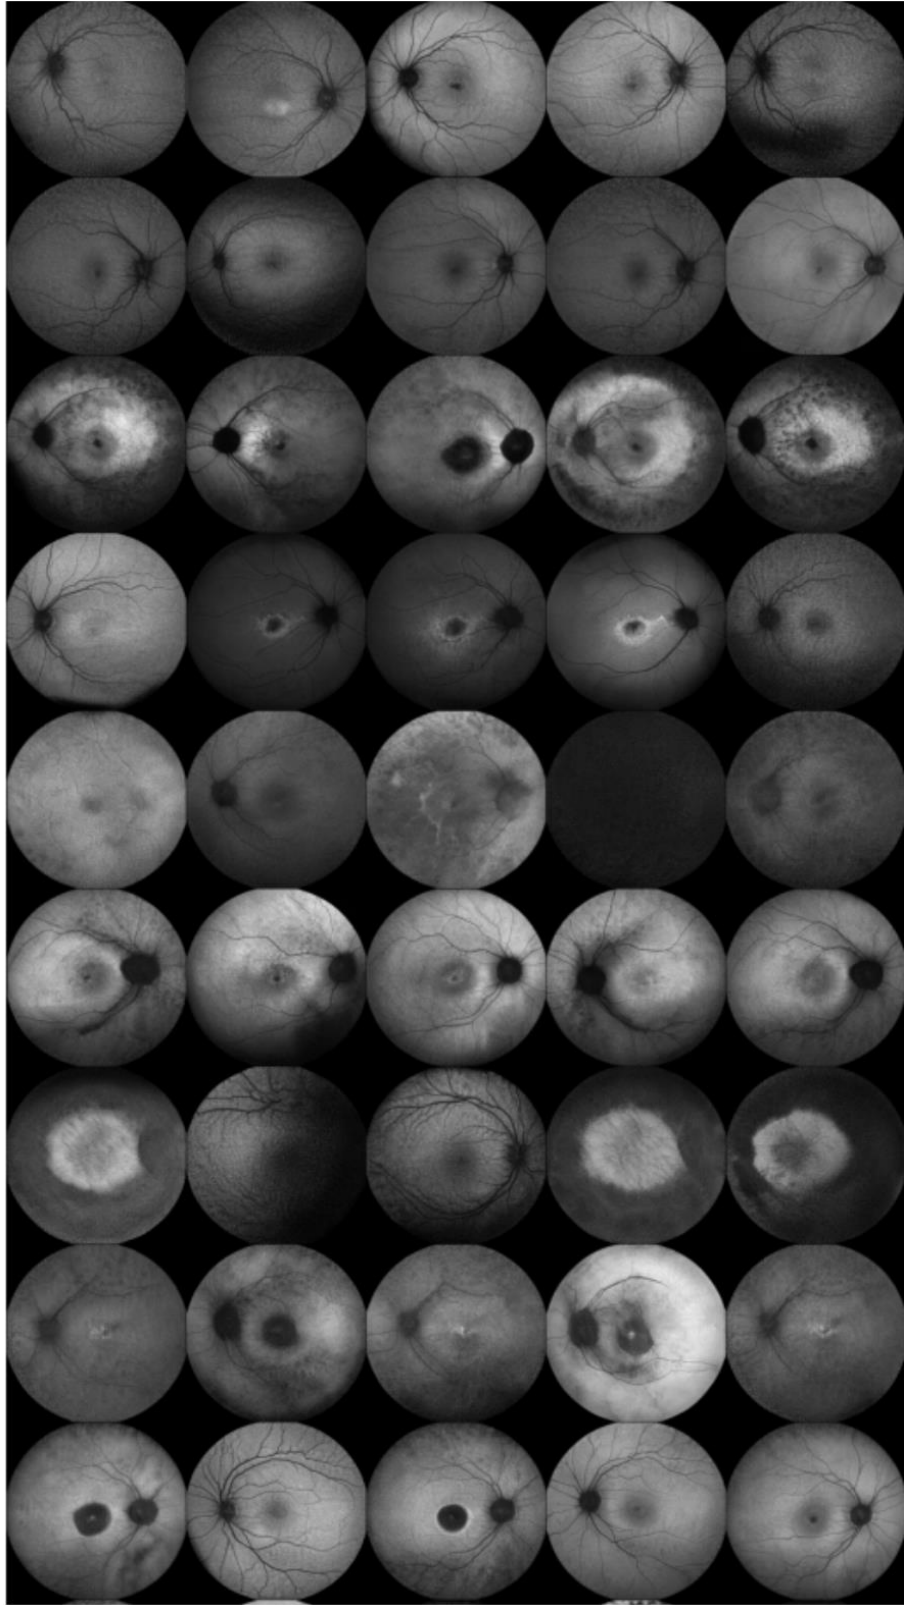

KCNV2 CDH23 PRPF8 CYP4V2 RP1L1 PDE6B OPA1 MTTL1 CERKL

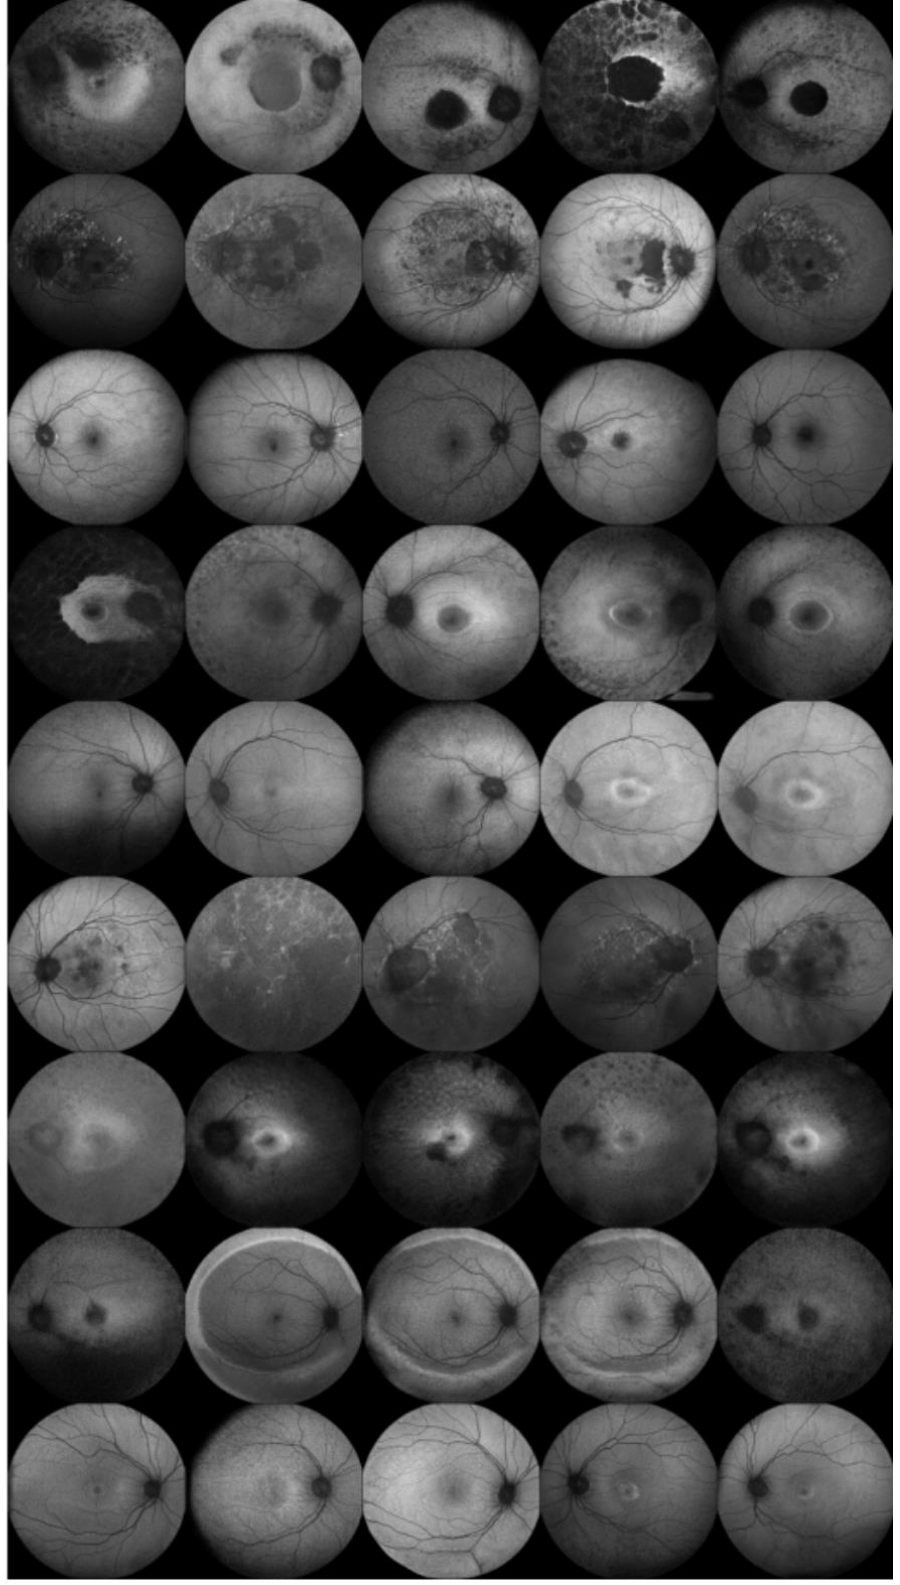

Supplement: mmc5.pdf [file mmc5.pdf]
