# Supplementary material for: SynthEye: Investigating the Impact of Synthetic Data on Artificial Intelligence-assisted Gene Diagnosis of Inherited Retinal Disease
Source: PubMed Central journal article supplement — Ophthalmol Sci. 2022 Nov 22;3(2):100258. doi: 10.1016/j.xops.2022.100258 (PMC9852957; doi:10.1016/j.xops.2022.100258), 2022-11-22

**Supplementary Figure 9: Examples of abnormal images found in our synthetic dataset. (a) Images with poor exposure (b) Images with content “leakage” (c) Vessel discontinuities highlighted within red-boxes.**

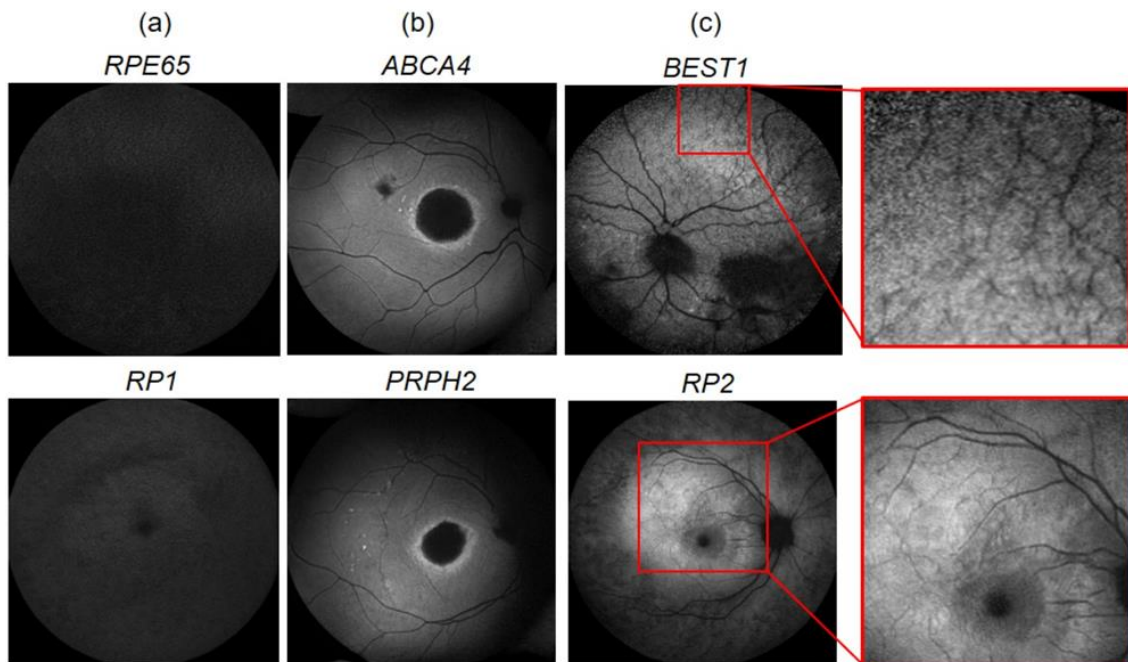

Supplement: mmc6.pdf [file mmc6.pdf]
