# Supplementary material for: SynthEye: Investigating the Impact of Synthetic Data on Artificial Intelligence-assisted Gene Diagnosis of Inherited Retinal Disease
Source: PubMed Central journal article supplement — Ophthalmol Sci. 2022 Nov 22;3(2):100258. doi: 10.1016/j.xops.2022.100258 (PMC9852957; doi:10.1016/j.xops.2022.100258), 2022-11-22

**Supplementary Figure 10: Most agreed-upon images between all experts who took the Visual Turing Test. First set of images are the synthetic images that all experts thought to look synthetic (unrealistic), while the second set of images are the synthetic images that appeared realistic.**

Agreed by all experts to appear synthetic

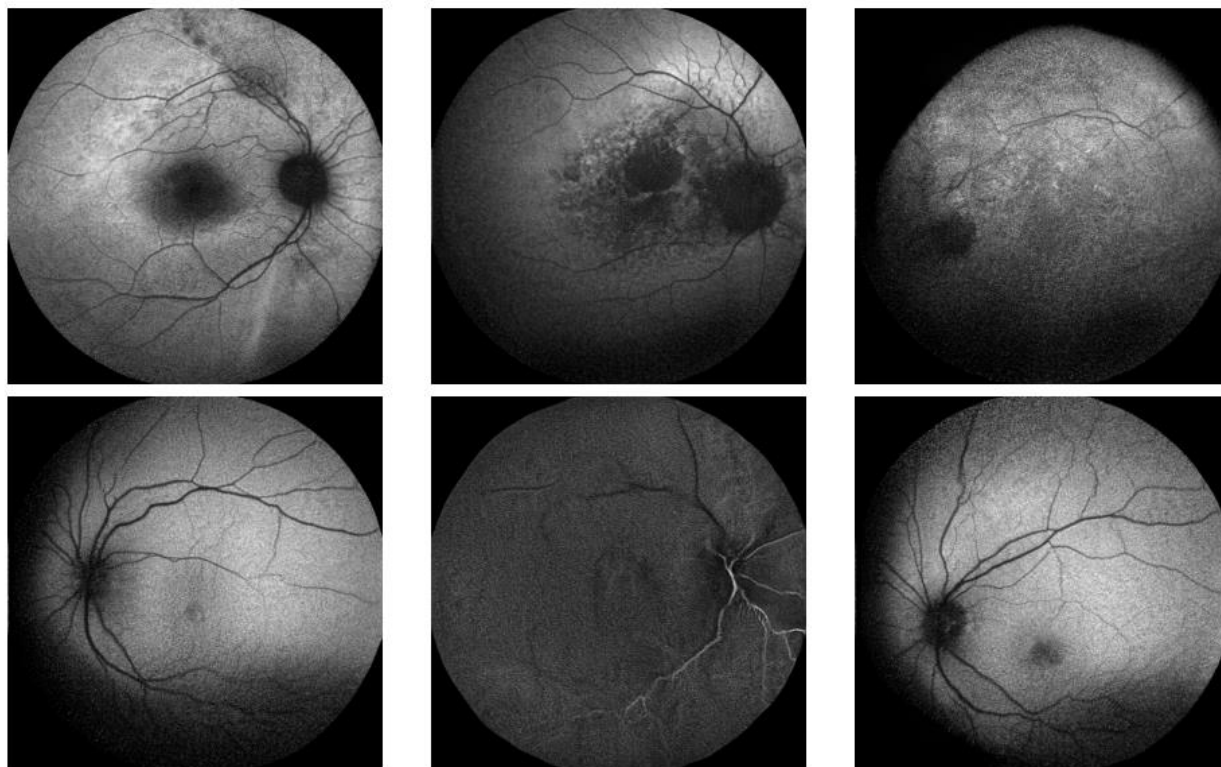

Agreed by all experts to appear realistic

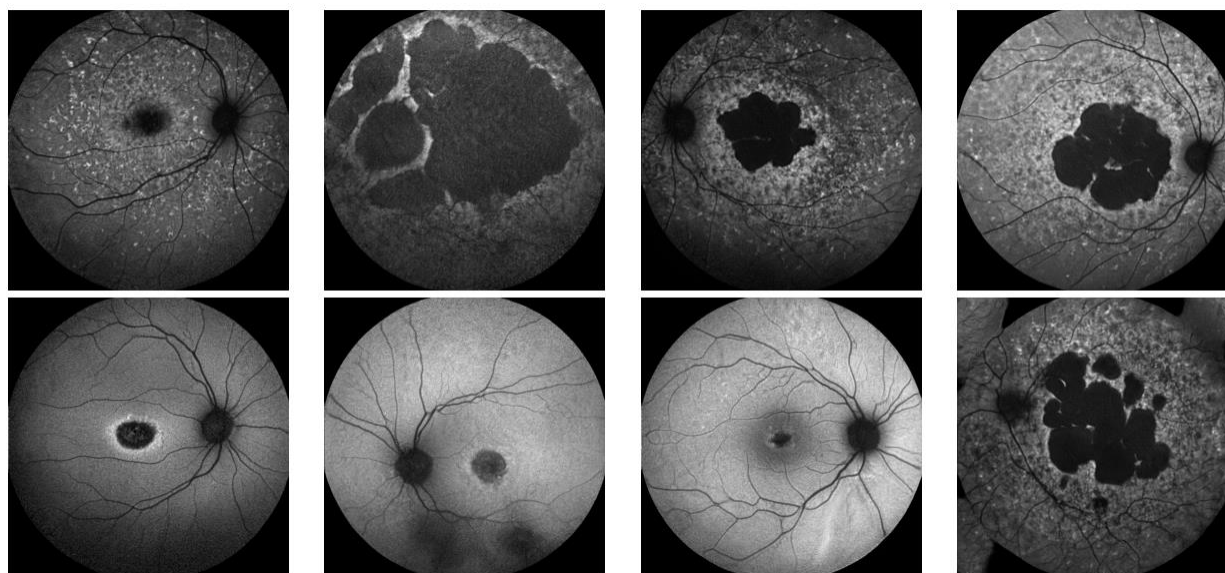

Supplement: mmc7.pdf [file mmc7.pdf]
