# Supplementary material for: SynthEye: Investigating the Impact of Synthetic Data on Artificial Intelligence-assisted Gene Diagnosis of Inherited Retinal Disease
Source: PubMed Central journal article supplement — Ophthalmol Sci. 2022 Nov 22;3(2):100258. doi: 10.1016/j.xops.2022.100258 (PMC9852957; doi:10.1016/j.xops.2022.100258), 2022-11-22

**Supplementary Figure 12: Feature space visualization of real and synthetic images for all 36 classes using the uniform manifold approximation and projection (UMAP) algorithm. Classes are mentioned in the top left corner of each subplot.**

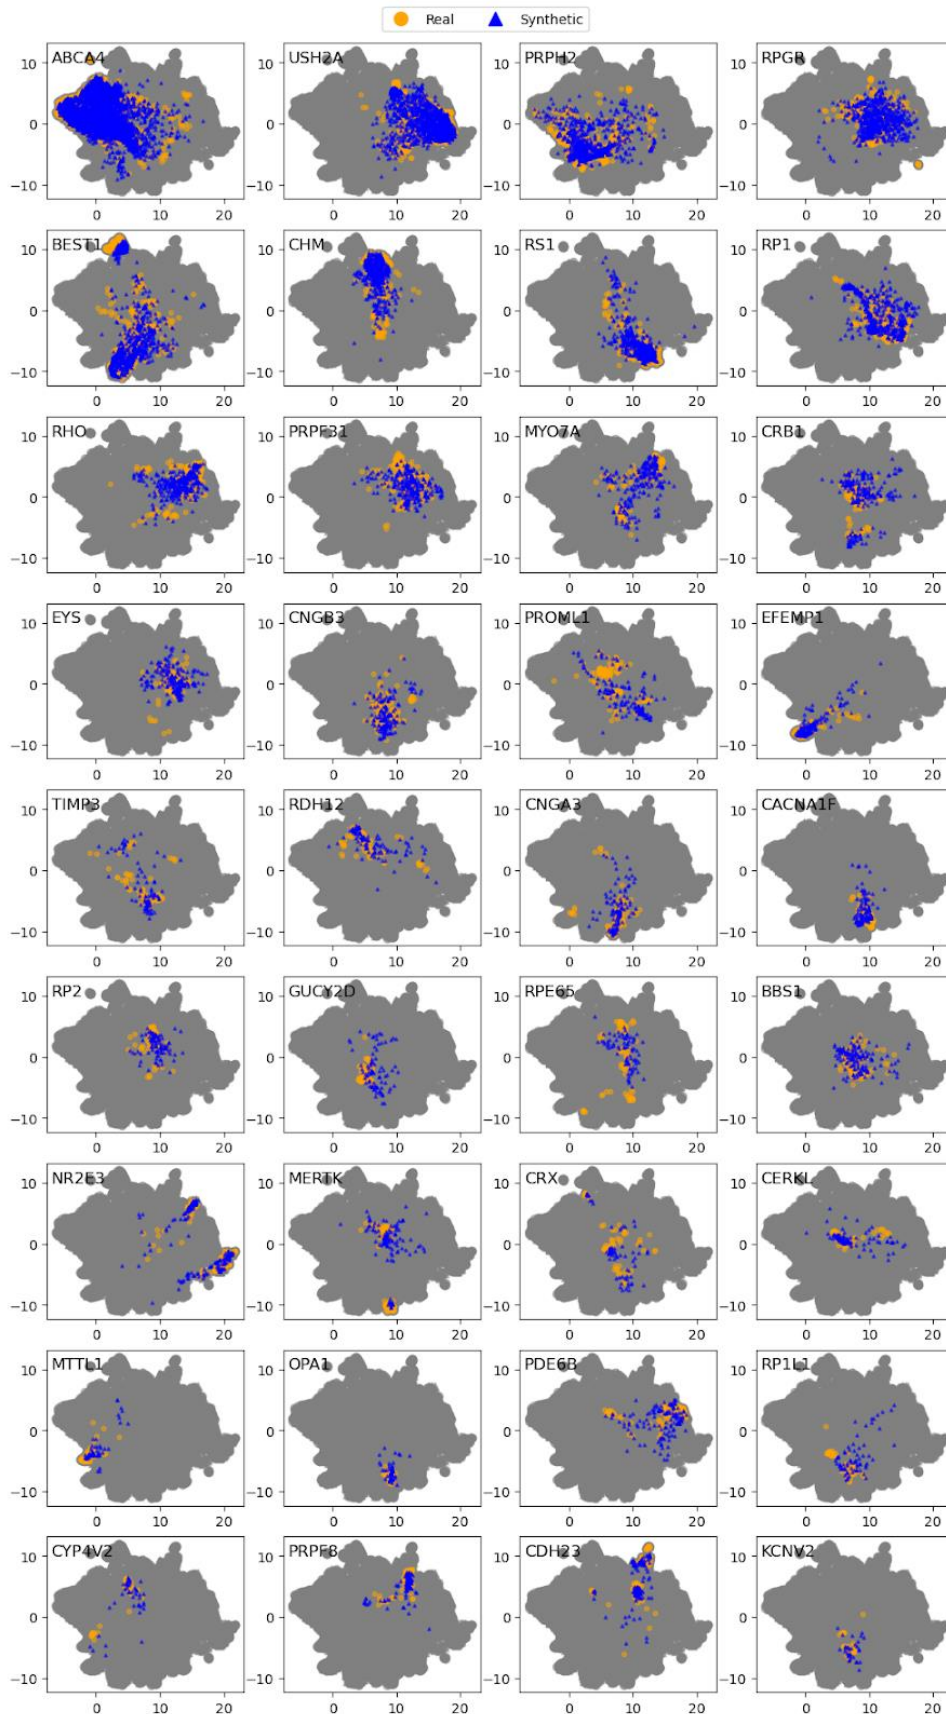

Supplement: mmc8.pdf [file mmc8.pdf]
