# Supplementary material for: SynthEye: Investigating the Impact of Synthetic Data on Artificial Intelligence-assisted Gene Diagnosis of Inherited Retinal Disease
Source: PubMed Central journal article supplement — Ophthalmol Sci. 2022 Nov 22;3(2):100258. doi: 10.1016/j.xops.2022.100258 (PMC9852957; doi:10.1016/j.xops.2022.100258), 2022-11-22

**Supplementary Figure 15: Most similar images detected by Learned Perceptual Image Patch Similarity metric for 10 classes.**

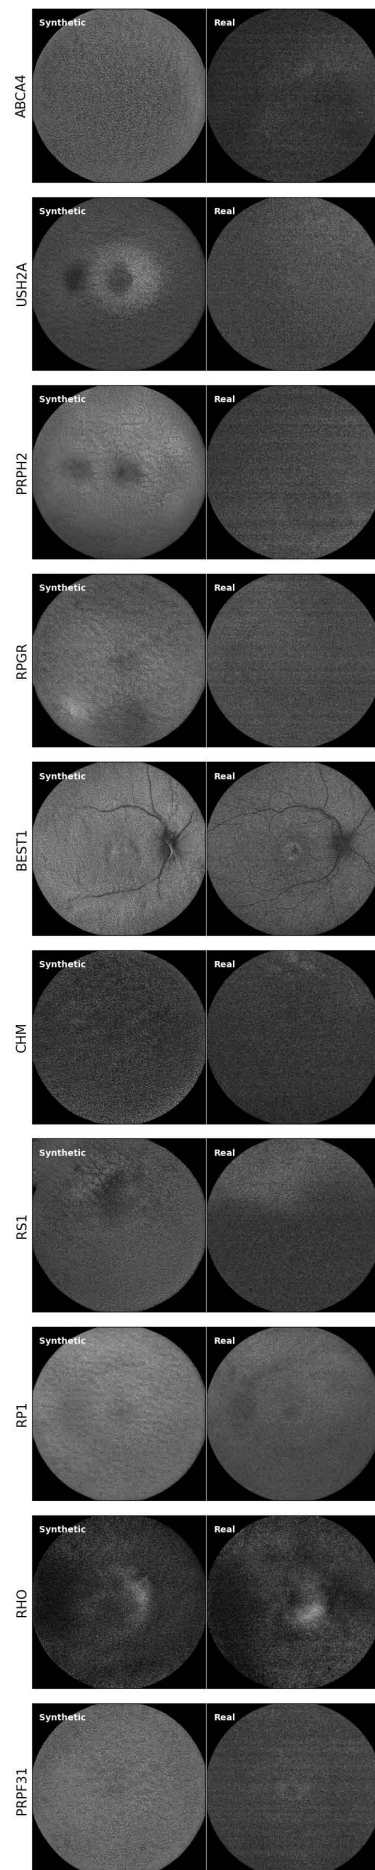

Supplement: mmc10.pdf [file mmc10.pdf]
