# Supplementary material for: SynthEye: Investigating the Impact of Synthetic Data on Artificial Intelligence-assisted Gene Diagnosis of Inherited Retinal Disease
Source: PubMed Central journal article supplement — Ophthalmol Sci. 2022 Nov 22;3(2):100258. doi: 10.1016/j.xops.2022.100258 (PMC9852957; doi:10.1016/j.xops.2022.100258), 2022-11-22

**Supplementary Figure 16: Distribution of Learned Perceptual Image Patch Similarity (LPIPS) scores when comparing real vs synthetic images and real vs real images.**

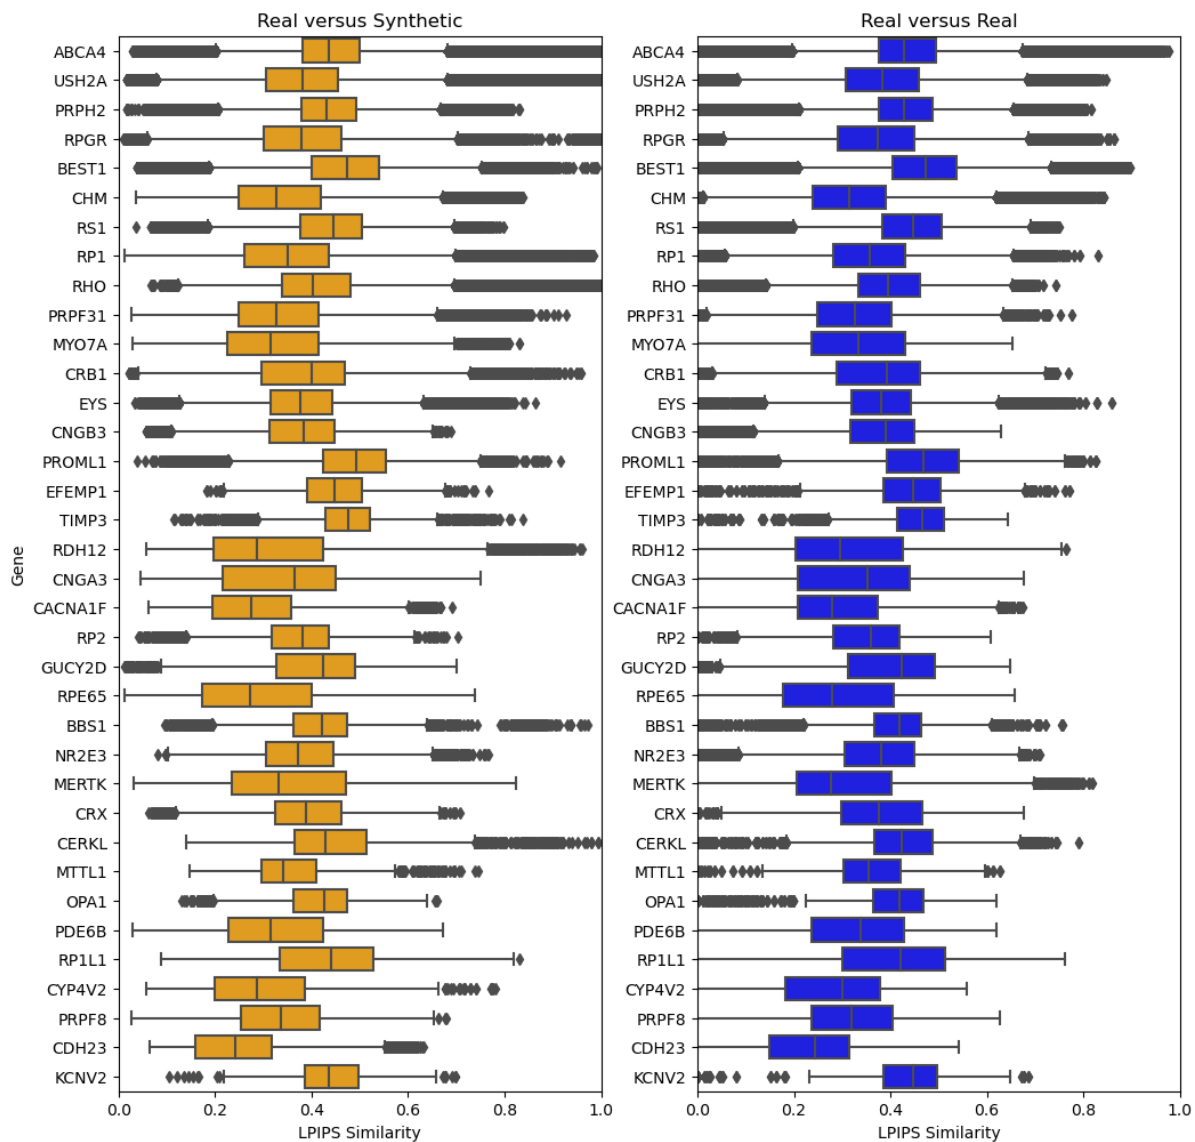

Supplement: mmc11.pdf [file mmc11.pdf]
