# Supplementary material for: SynthEye: Investigating the Impact of Synthetic Data on Artificial Intelligence-assisted Gene Diagnosis of Inherited Retinal Disease
Source: PubMed Central journal article supplement — Ophthalmol Sci. 2022 Nov 22;3(2):100258. doi: 10.1016/j.xops.2022.100258 (PMC9852957; doi:10.1016/j.xops.2022.100258), 2022-11-22

**Supplementary Figure 18: Blind Referenceless Image Spatial Quality Estimator (BRISQUE) scores for synthetic and real images of all 36 classes. For all classes, we find a significantly higher ( $p < 0.05$ ) BRISQUE score for synthetic images relative to real images, suggesting poorer overall image quality.**

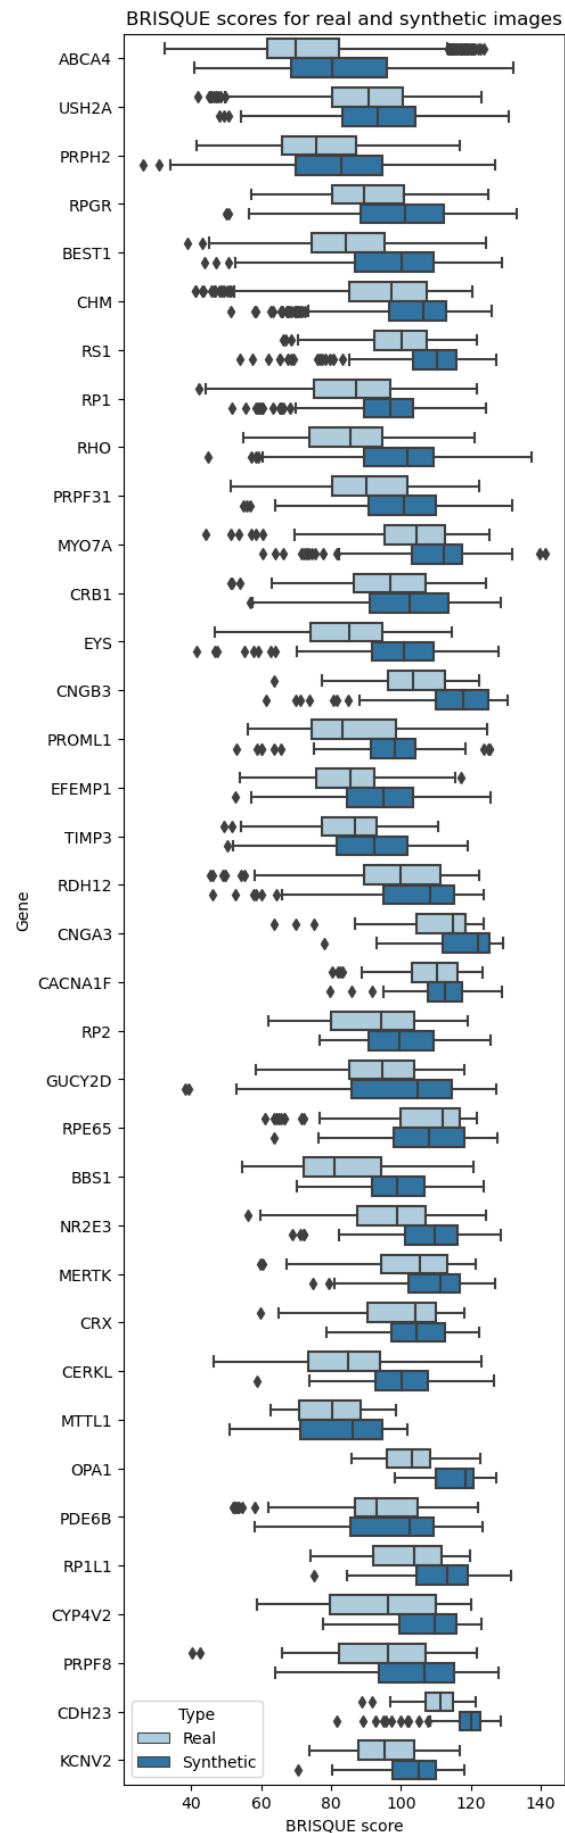

Supplement: mmc12.pdf [file mmc12.pdf]
