# Supplementary material for: SynthEye: Investigating the Impact of Synthetic Data on Artificial Intelligence-assisted Gene Diagnosis of Inherited Retinal Disease
Source: PubMed Central journal article supplement — Ophthalmol Sci. 2022 Nov 22;3(2):100258. doi: 10.1016/j.xops.2022.100258 (PMC9852957; doi:10.1016/j.xops.2022.100258), 2022-11-22

**Supplementary Figure 21: Receiver operating characteristic (ROC) curves evaluating the IRD classifier performance per class. The ROC curves in each subplot represent five models from Regime 2 and 1.5, which are defined in Table 1. The figure legend contains the area under the ROC curve which describes the diagnostic ability of the model between 0 (poor classifier) to 1 (optimal classifier). \* indicates significant difference between the area under ROC (AUROC) of the model and the baseline R model in that plot ( $p < 0.05$ , Delong's test).**

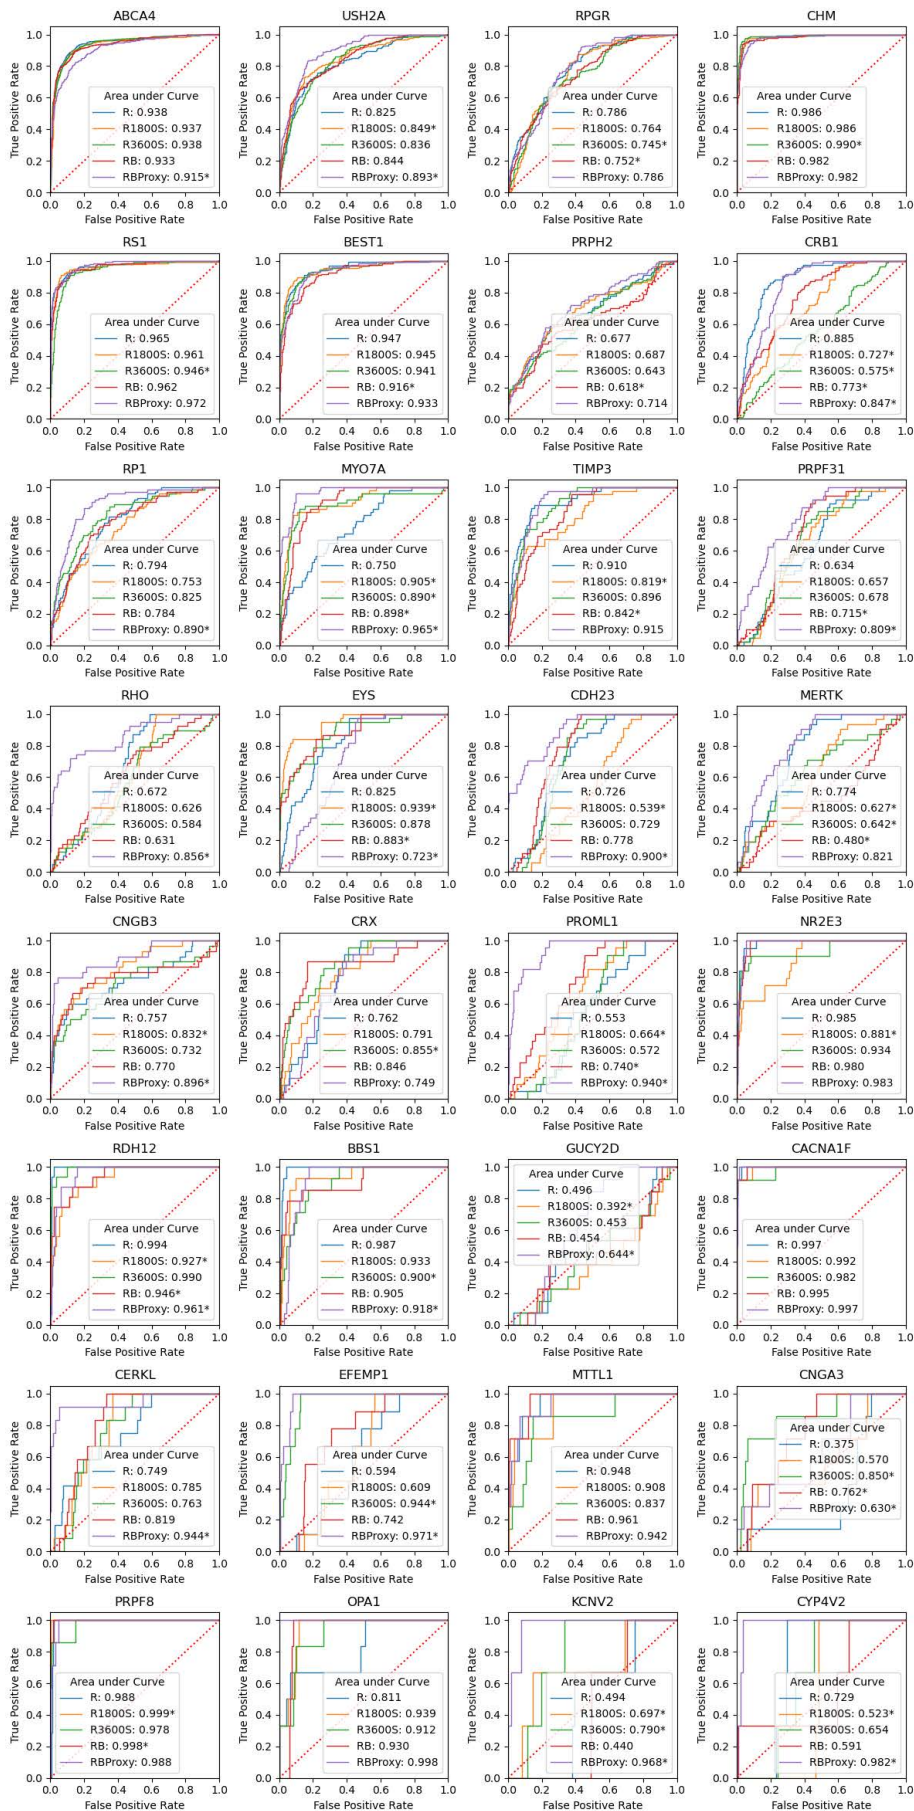

Supplement: mmc14.pdf [file mmc14.pdf]
