# Supplementary material for: SynthEye: Investigating the Impact of Synthetic Data on Artificial Intelligence-assisted Gene Diagnosis of Inherited Retinal Disease
Source: PubMed Central journal article supplement — Ophthalmol Sci. 2022 Nov 22;3(2):100258. doi: 10.1016/j.xops.2022.100258 (PMC9852957; doi:10.1016/j.xops.2022.100258), 2022-11-22

**Supplementary Figure 26: Confusion Matrix for the IRD classifier model trained on the entire real IRD training dataset plus 3600 synthetic images (100 images augmented per class) (R3600S – Regime 1). Values are normalized over the true predictions (rows), thus each value represents the proportion of true examples classified by the model as the predict class indicated by the column.**

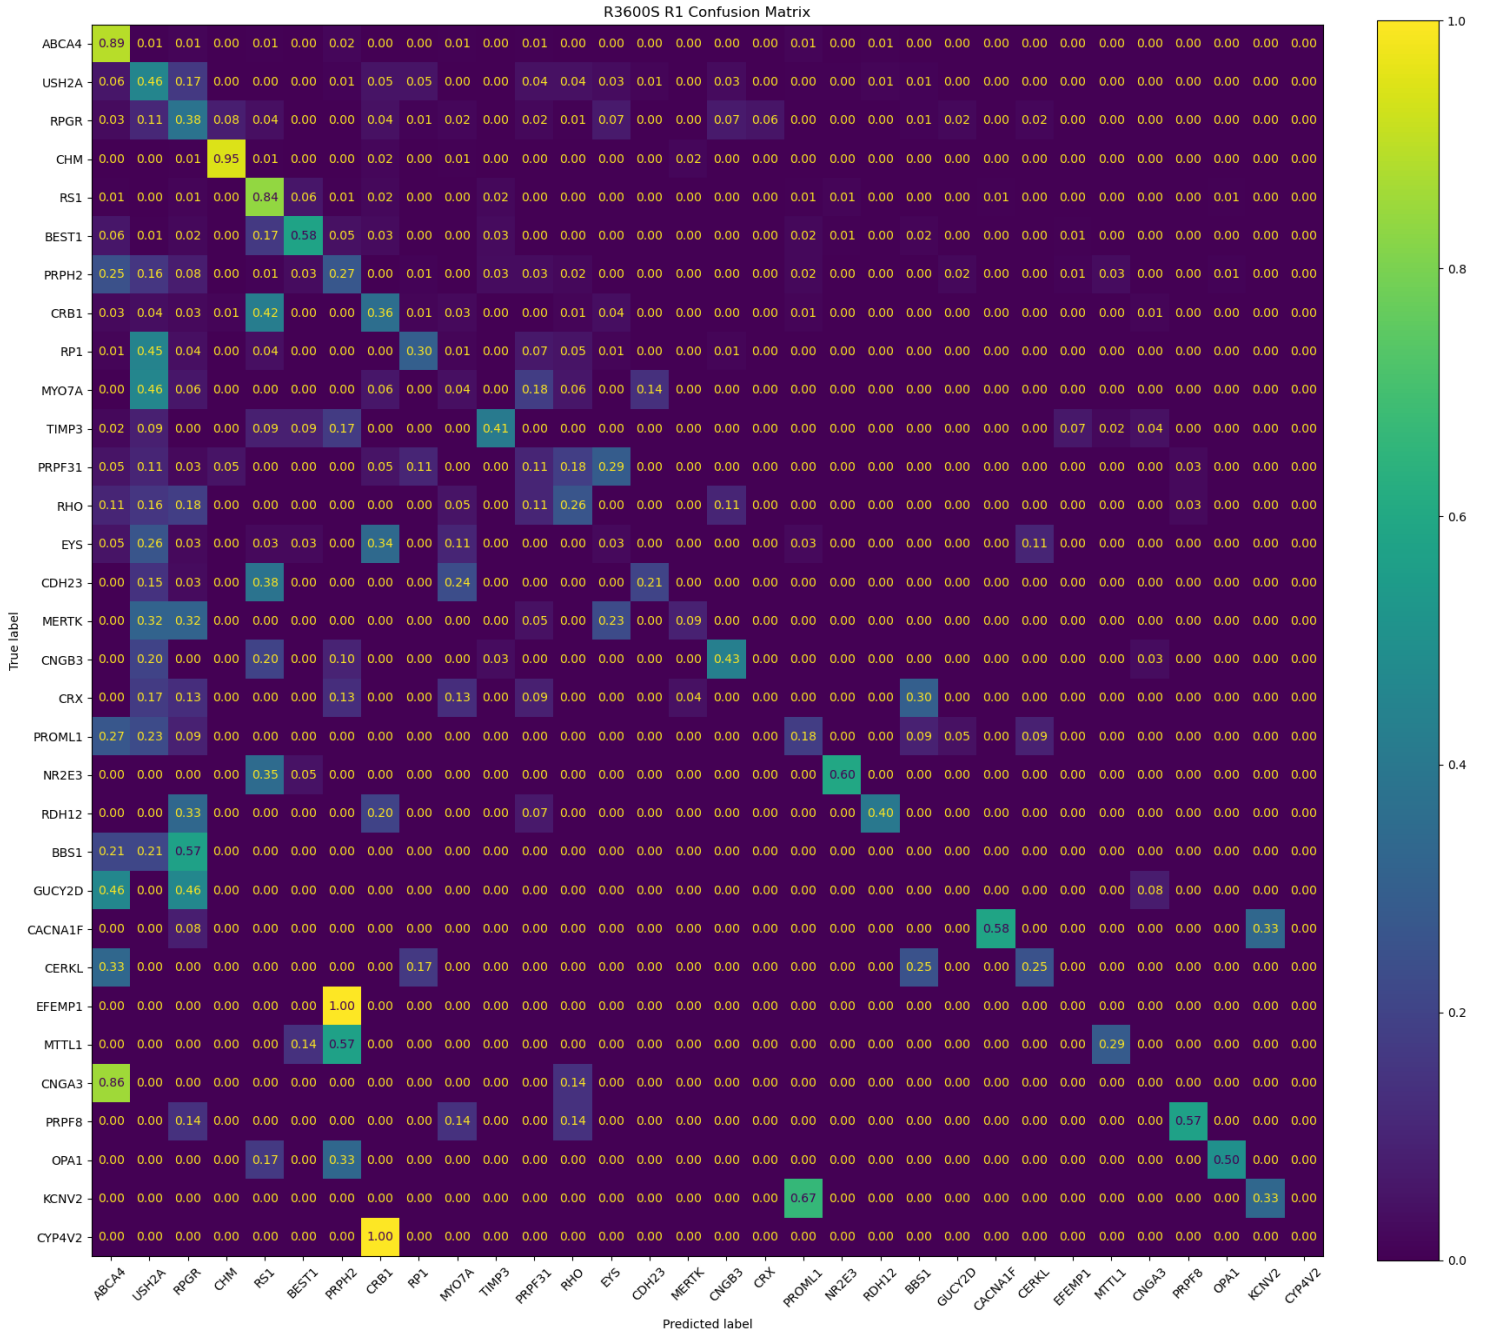

Supplement: mmc19.pdf [file mmc19.pdf]
