# Supplementary material for: SynthEye: Investigating the Impact of Synthetic Data on Artificial Intelligence-assisted Gene Diagnosis of Inherited Retinal Disease
Source: PubMed Central journal article supplement — Ophthalmol Sci. 2022 Nov 22;3(2):100258. doi: 10.1016/j.xops.2022.100258 (PMC9852957; doi:10.1016/j.xops.2022.100258), 2022-11-22

**Supplementary Figure 31: Confusion Matrix for the IRD classifier model trained on roughly 20% of the IRD training dataset rebalanced with synthetic data learned from the entire training dataset. This will assess the applicability of synthetic data as a proxy for real data. (RBProxy – Regime 1.5). Values are normalized over the true predictions (rows), thus each value represents the proportion of true examples classified by the model as the predict class indicated by the column.**

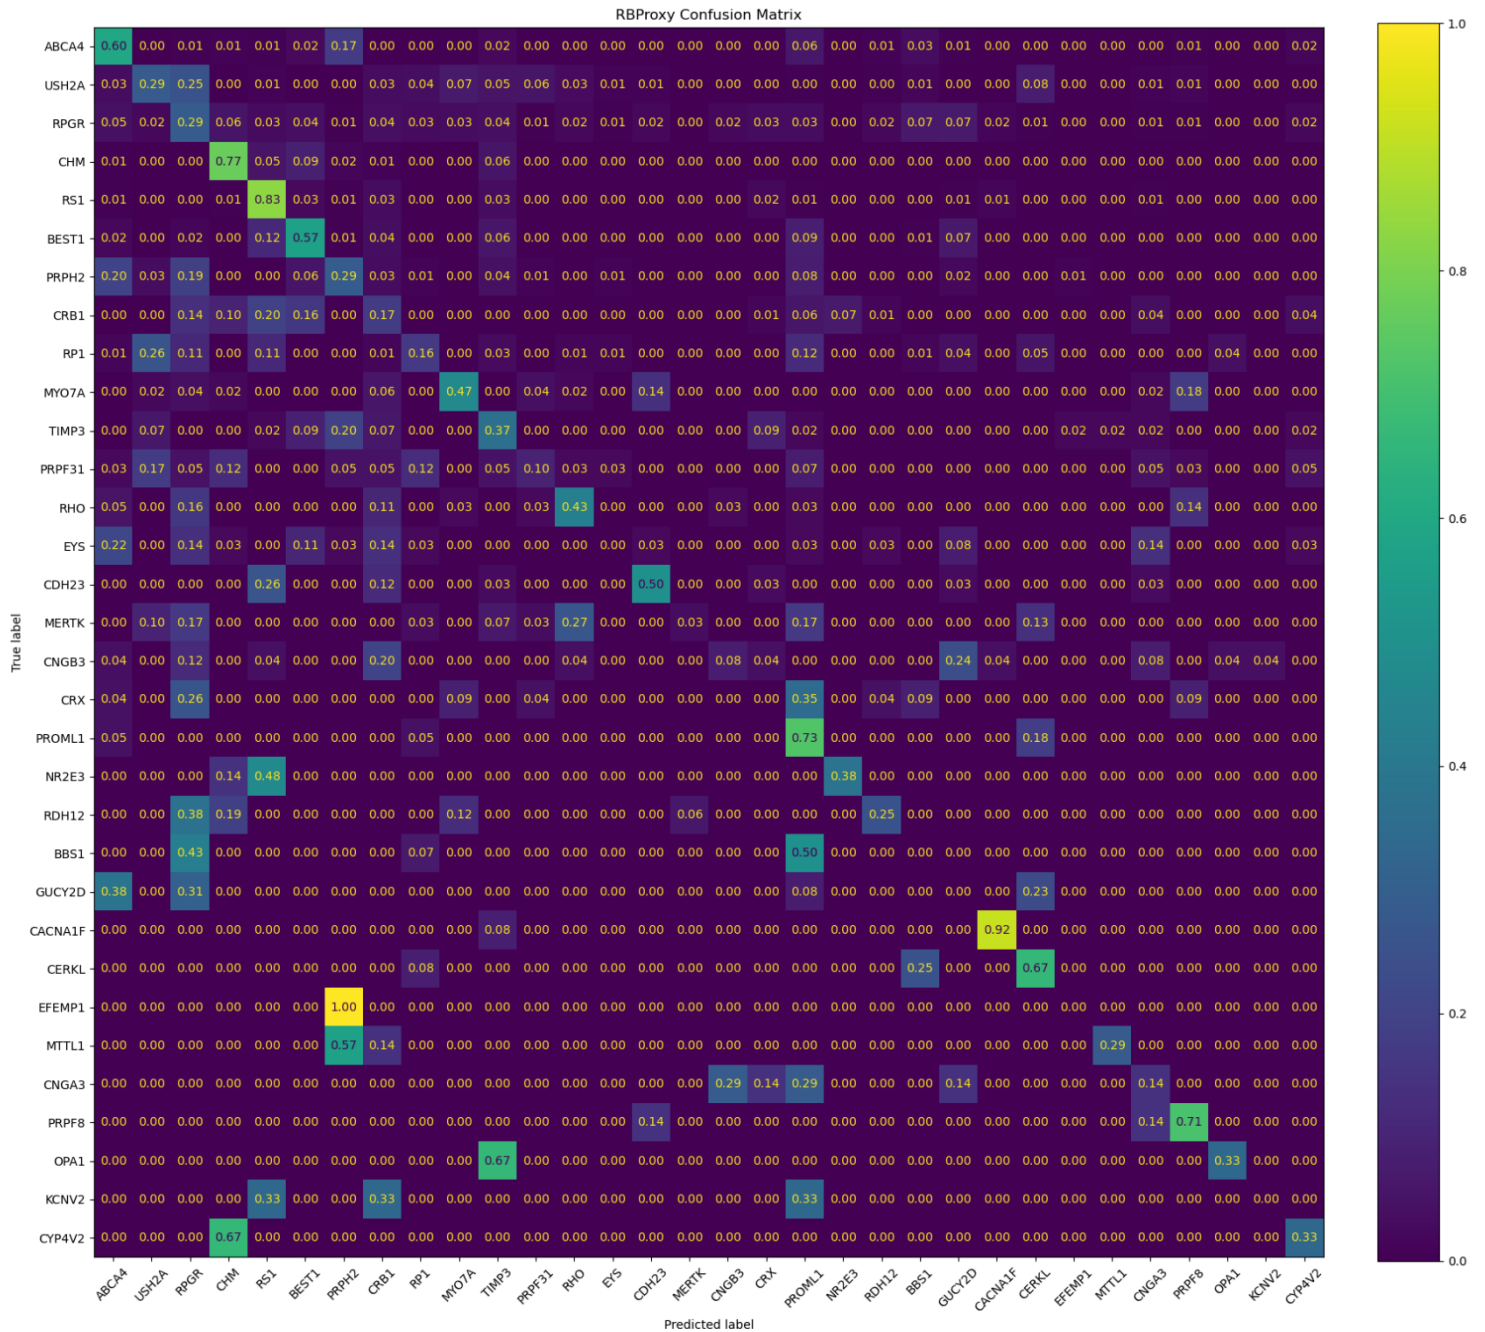

Supplement: mmc24.pdf [file mmc24.pdf]
