# Supplementary material for: SynthEye: Investigating the Impact of Synthetic Data on Artificial Intelligence-assisted Gene Diagnosis of Inherited Retinal Disease
Source: PubMed Central journal article supplement — Ophthalmol Sci. 2022 Nov 22;3(2):100258. doi: 10.1016/j.xops.2022.100258 (PMC9852957; doi:10.1016/j.xops.2022.100258), 2022-11-22
Supplement: mmc25.pdf [file mmc25.pdf]

**Supplementary Table 1: Hyperparameters for StyleGAN2 model. Using these settings, we trained the model on our inherited retinal disease dataset, which lasted for approximately 2-3 days on two NVIDIA-GeForce RTX 3090 GPUs.**

| <b>Hyperparameter</b> | <b>Description</b>                                                                                                                                                                          | <b>Value</b>                          |
|-----------------------|---------------------------------------------------------------------------------------------------------------------------------------------------------------------------------------------|---------------------------------------|
| z-dim                 | Size of random noise vector inputted to the GAN                                                                                                                                             | 512                                   |
| w-dim                 | Size of the “style” vector that is generated by the mapping network of the StyleGAN. This contains information on the image stylistic features that are injected into the generator layers. | 512                                   |
| c-dim                 | Dimensionality of the embedded features after an implicit initial transformation of the class index, which ranges from 0 to 35.                                                             | 512                                   |
| k-img                 | The number of training iterations is measured in terms of the number of images (in thousands) shown to the GAN. This is represented as k-img.                                               | 5000                                  |
| Learning rate         | The size of the steps taken by the generator/discriminator to optimize its parameters during training.                                                                                      | 0.002 for generator and discriminator |
| Batch-size            | Number of images passed in a batch to the model during each training iteration.                                                                                                             | 32                                    |
| Optimizer parameters  | The optimization algorithm for updating neural network parameters during training.                                                                                                          | Adam( $\beta_1=0$ , $\beta_2=0.99$ )  |
