# Supplementary material for: SynthEye: Investigating the Impact of Synthetic Data on Artificial Intelligence-assisted Gene Diagnosis of Inherited Retinal Disease
Source: PubMed Central journal article supplement — Ophthalmol Sci. 2022 Nov 22;3(2):100258. doi: 10.1016/j.xops.2022.100258 (PMC9852957; doi:10.1016/j.xops.2022.100258), 2022-11-22
Supplement: mmc26.pdf [file mmc26.pdf]

**Supplementary Table 3: Hyperparameter settings for our convolutional neural network classifier training experiments. Depending on the size of the training dataset, the model training duration ranged from 2 hours to 16 hours.**

| <b>Hyperparameter</b> | <b>Description</b>                                                                   | <b>Value</b>                            |
|-----------------------|--------------------------------------------------------------------------------------|-----------------------------------------|
| Epochs                | Number of training iterations                                                        | 100                                     |
| Learning rate         | The size of the steps taken by the model to optimize its parameters during training. | 0.0001 for generator and discriminator  |
| Batch-size            | Number of images passed in a batch to the model during each training iteration.      | 128                                     |
| Optimizer parameters  | The optimization algorithm for updating neural network weights during training.      | Adam( $\beta_1=0.9$ , $\beta_2=0.999$ ) |
